# Supplementary material for: In Situ Tumor PD-L1 mRNA Expression Is Associated with Increased TILs and Better Outcome in Breast Carcinomas
Source: Oxford University Press journal article supplement (doi:10.1158/1078-0432.ccr-13-2702), 2014-03-19
Supplement: 10780432ccr132702-sup-tab1.xlsx [file 10780432ccr132702-sup-tab1.xlsx]

## Sheet: Sheet1
	YTMA 201	YTMA 128
Parameter	N (%)	N (%)
All patients	399	233
Age (y)
<50	124 (31)	72 (31)
≥50	258 (64.5)	143 (61.3)
unknown	17 (4.3)	18 (7.7)
Nodal Status
positive	78 (19.5)	70 (30)
negative	203 (50.8)	144 (61.8)
unknown	118 (29.5)	19 (8.2)
Tumor Size
≤2 cm	218 (54.5)	147 (63)
2-5 cm	69(17.3)	65 (28)
≥5 cm	4 (1)	10 (4.3)
unknown	108 (27)	11 (4.7)
ERa (IHC)
positive (1-3)	205 (51.3)	160 (68.7)
negative (0)	134 (33.5)	39 (16.7)
unknown	60 (15)	34 (14.6)
PR (IHC)
positive (1-3)	52 (13)	140 (60)
negative (0)	278 (69.5)	59 (25.3)
unknown	69 (17.3)	24 (14.6)
HER2 (IHC)
positive (2-3)	36 (9)	55 (23.6)
negative (0-1)	272 (68)	139 (59.7)
unknown	91 (22.8)	39 (16.7)
Follow-up (m)
median (range)	83 (2-327)	49 (1-340)
Treatment
Tamoxifen Only	93 (23.3)
Chemotherapy Only	72 (18)
Tamoxifen+Chemo	48 (12)
None	89 (22.3)
Unknown	97 (24.3)
Table 1. Clinicopathological characteristics of YTMA 201 and 128

## Sheet: without treatment
TableS1. Clinicopathological characteristics of YTMA128 and 201
	YTMA128	YTMA201
Parameter	N (%)	N (%)
All patients	238	398
Age (y)
<50	75 (31.5)	124 (31.2)
≥50	147 (61.8)	257 (64.6)
unknown	16 (6.7)	17 (4.3)
Nodal Status
Positive	72 (30.3)	78 (19.6)
Negative	153 (64.3)	203 (51.0)
Unknown	13 (5.5)	117 (29.4)
Tumor Size
≤2 cm	149 (62.6)	217 (54.5)
2-5 cm	64 (26.9)	69 (17.3)
≥5 cm	12 (5.0)	4 (1)
Unknown	13 (5.5)	108 (27)
ERα
Positive (1-3)	162 (68.1)	264 (66.3)
Negative (0)	39 (16.4)	89 (22.3)
Unknown	37 (15.5)	45 (11.3)
HER2
Positive (3+)	21 (8.8)	20 (5)
Negative (0-1+)	140 (58.8)	272 (68.3)
Unknown/equivocal	77 (32.4)	106 (26.6)
Adjuvant treatment
Hormonal only	NA	93 (23.4)
Chemotherapy Only	NA	72 (18.1)
Hormonal+Chemo	NA	48 (12.1)
None	NA	89 (22.4)
Unknown	NA	96 (24.1)
Follow-up (m)
Median (range)	52 (1-340)	139 (3-385)
ERα= Estrogen receptor alpha; NA= Not available.
